# Supplementary material for: Evaluation by simulation of clinical trial designs for evaluation of treatment during a viral haemorrhagic fever outbreak
Source: Research Square preprint supplement (doi:10.21203/rs.3.rs-104623/v1), 2020-11-13
Supplement: Supplementary file 1 [file a6f57cbbce15195bc91de6bd.docx]

**Additional file 1**

Additional file 1. Description of the assessed clinical trial designs.

|  | **Single-arm**   - **Historical comparison** | **Two-arm**   - **Randomization 1:1** | **Statistical analyses** |
| --- | --- | --- | --- |
| **Fixed design** | F1  H0: *vs*.  H1: | F2  H0: *vs*.  H1: | Unilateral Z tests  If p-value < 0.025, significant test |
| **Sequential design** | S1  H0: Θ = 0 *vs.* H1: Θ > 0,  with Θ | S2  H0: Θ = 0 *vs*. H1: Θ > 0,  with Θ | - Whitehead triangular tests - Stopping boundaries defined with α = 0.025 - Significant test if the test statistic was superior to the upper stopping boundary - Number of interim analyses defined a priori: every 20 patients included |

Abbreviations: indicates control survival rate; pH: pre-trial historical survival rate; : experimental survival rate; F1: fixed single-arm design; S1: group-sequential single-arm design; F2: fixed double-arm design; S2: group-sequential double-arm design.
